# Supplementary material for: Graphite Felt Electrode Modified by Quaternary Ammonium for Vanadium Redox Flow Battery with an Ultra-Long Cycle Life
Source: MDPI journal article supplement (doi:10.3390/inorganics10110208), 2022-11-15
Supplement: s1 [file s1]

# Supporting Information

## Graphite felt electrode of quaternary ammonium doped for vanadium redox flow battery

Liu Xuejiao <sup>1</sup>, Hu Junping <sup>1\*</sup>, Liu Jun <sup>1</sup>, Liu Hongyi <sup>1</sup>, Fu Sha <sup>1</sup> and Wu Xiongwei <sup>1\*</sup>, Wu Yuping <sup>2</sup>

<sup>1</sup> School of Chemistry and Materials Science, College of Resources and Environment, Hunan Agricultural University, Changsha, 410128, China

<sup>2</sup> State Key Laboratory of Materials-Oriented Chemical Engineering & School of Energy Science and Engineering, Nanjing Tech University Nanjing, Nanjing, 211816, China

\* Correspondence: [hjp864569039@163.com](mailto:hjp864569039@163.com); [wxxw@hunau.edu.cn](mailto:wxxw@hunau.edu.cn)

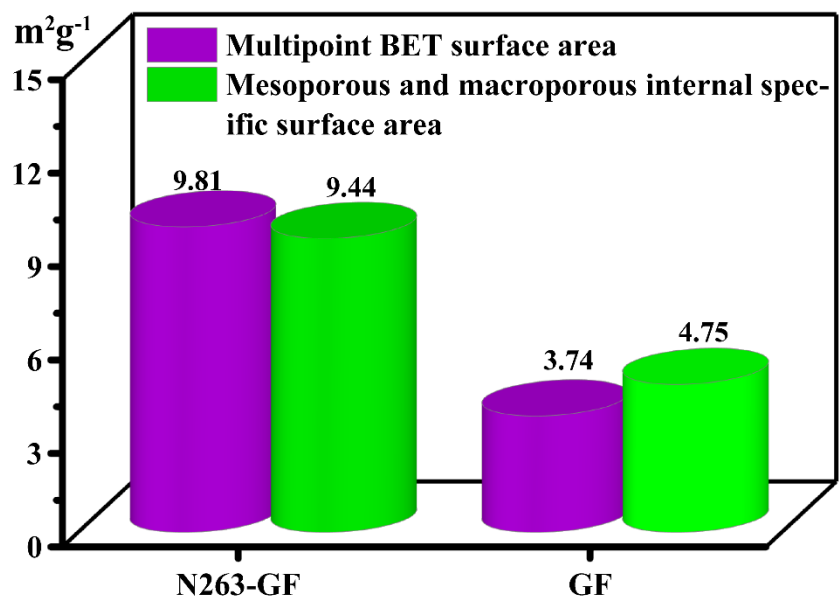

**Figure S1.** Results of multipoint BET specific surface area and mesoporous, microporous internal surface area tests on N263-GF, GF

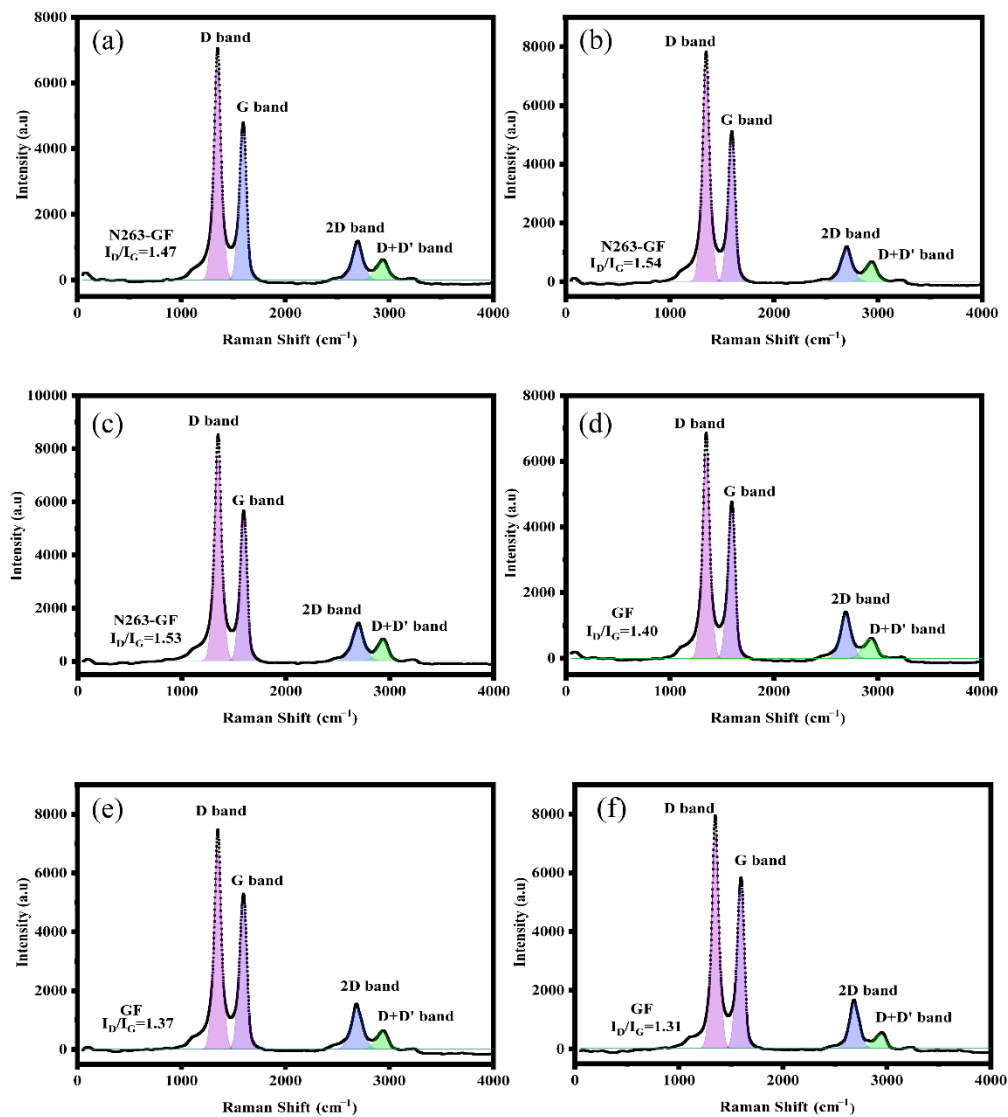

**Figure S2.** Raman spectra of different regions of N263-GF (a, b, c) and GF (d, e, f)

**Table S1.** Raman spectrometer test results in different regions of electrodes

| Sample  |   | D band area | G band area | I <sub>D</sub> /I <sub>G</sub> |
|---------|---|-------------|-------------|--------------------------------|
| N263-GF | a | 647726      | 439151      | 1.47                           |
|         | b | 714705      | 462932      | 1.54                           |
|         | c | 779626      | 508132      | 1.53                           |
|         | d | 626680      | 447624      | 1.40                           |
| GF      | e | 683918      | 496714      | 1.37                           |
|         | f | 703982      | 538401      | 1.31                           |

In the Table S1, Raman spectra were taken at three different locations on the electrode materials of N263-GF and GF of size 3×3 cm and labeled a, b, c and d, e, f.

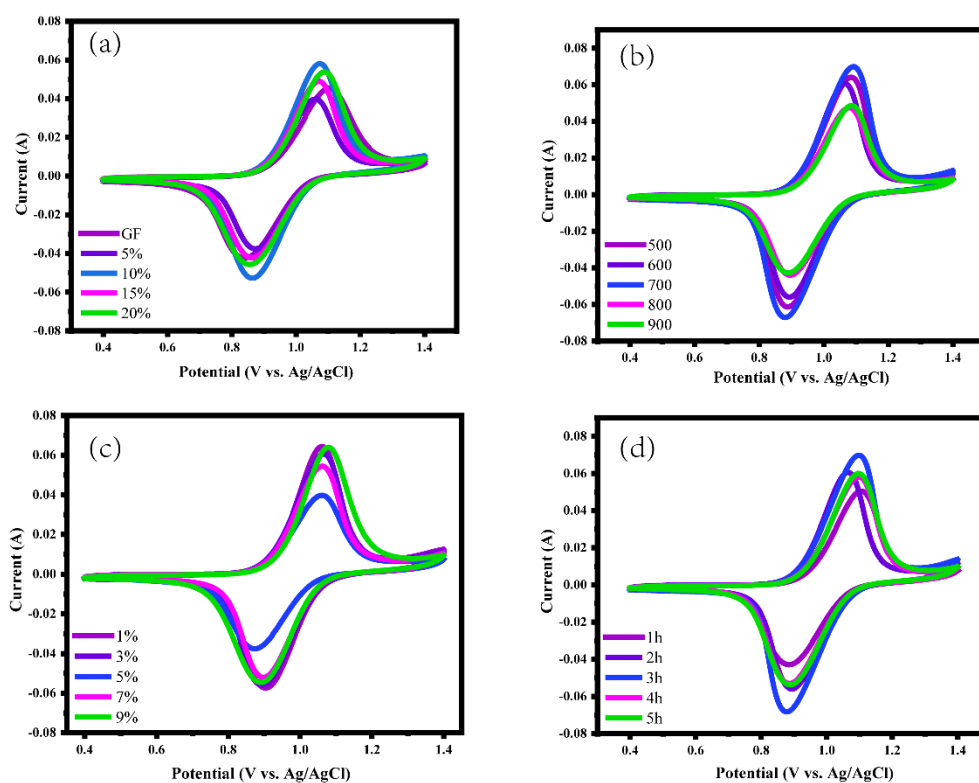

**Figure S3.** Comparison of cyclic voltammetry tests at 10mV/s for electrodes prepared under different conditions

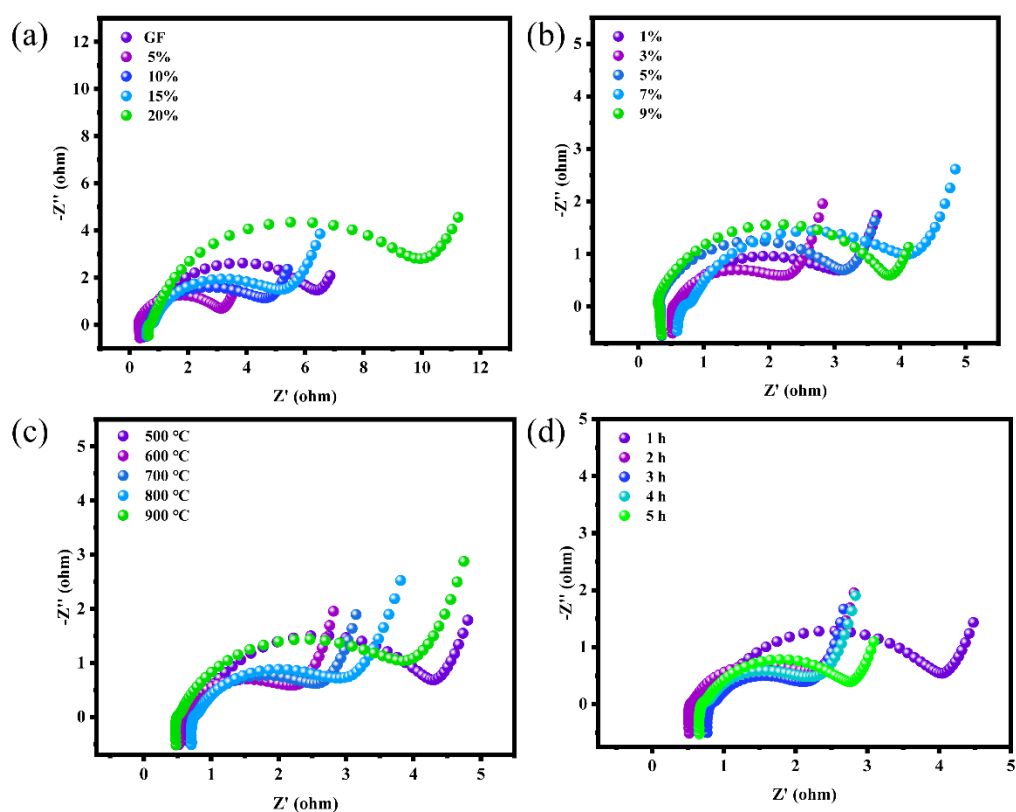

**Figure S4.** AC impedance diagram of electrodes prepared under different conditions

Single-factor experiments were conducted for the addition amount of N263, argon atmosphere treatment temperature and time, respectively. From Figure S3 and Figure S4, it can be seen that the best performing cell can be obtained by treating N263-GF in argon atmosphere at 600 °C for 2 h after adding 3% N263.

**Table S2.** Values of the AC impedance equivalent circuit elements

| Sample  | L1        | R1      | C1       | R2      | Wo    |       |         |
|---------|-----------|---------|----------|---------|-------|-------|---------|
|         |           |         |          |         | Wo-R  | Wo-T  | Wo-P    |
| N263-GF | 9.6128E-7 | 0.46974 | 0.029148 | 0.96924 | 4.579 | 2.373 | 0.45289 |
| GF      | 1.0085E-6 | 0.43166 | 0.012483 | 4.31    | 5.553 | 7.136 | 0.39294 |

**Table S3.** Positive electrode vanadium ion diffusion coefficient

|         | Scan rate (mV s <sup>-1</sup> )                   | 5       | 10      | 20                     | 30      | 40      |
|---------|---------------------------------------------------|---------|---------|------------------------|---------|---------|
| N263-GF | I <sub>po</sub> /A (mA cm <sup>-2</sup> )         | 0.1032  | 0.1676  | 0.2732                 | 0.3572  | 0.4272  |
|         | I <sub>pr</sub> /A (mA cm <sup>-2</sup> )         | -0.086  | -0.1448 | -0.2376                | -0.3104 | -0.3716 |
|         | Ko                                                |         |         | 0.0798                 |         |         |
|         | Kr                                                |         |         | -0.0702                |         |         |
|         | D <sub>o</sub> (cm <sup>2</sup> s <sup>-1</sup> ) |         |         | 8.80×10 <sup>-12</sup> |         |         |
|         | D <sub>r</sub> (cm <sup>2</sup> s <sup>-1</sup> ) |         |         | 6.81×10 <sup>-12</sup> |         |         |
|         | I <sub>po</sub> /A (mA cm <sup>-2</sup> )         | 0.0696  | 0.1172  | 0.1916                 | 0.2492  | 0.2976  |
|         | I <sub>pr</sub> /A (mA cm <sup>-2</sup> )         | -0.0568 | -0.098  | -0.1652                | -0.2168 | -0.2596 |
| GF      | Ko                                                |         |         | -0.056                 |         |         |
|         | Kr                                                |         |         | -0.050                 |         |         |
|         | D <sub>o</sub> (cm <sup>2</sup> s <sup>-1</sup> ) |         |         | 4.33×10 <sup>-12</sup> |         |         |
|         | D <sub>r</sub> (cm <sup>2</sup> s <sup>-1</sup> ) |         |         | 3.45×10 <sup>-12</sup> |         |         |

In the Table S3, The apparent diffusion coefficient D can be obtained by bringing the test results into the equation using CV tests with different scan rates of the positive electrode, where K is the slope value in Figure 5d.
